# Supplementary material for: Sulfur doping activated metal–support interaction drives Pt nanoparticles to achieve acid–base hydrogen evolution reaction
Source: Royal Society of Chemistry journal article supplement (doi:10.1039/d4ta08499c), 2025-01-01
Supplement: d4ta08499c1.pdf [file d4ta08499c1.pdf]

### Supplementary Information

#### **Sulfur doping activated metal-support interaction drives Pt nanoparticles to achieve acid-base hydrogen evolution reaction**

Yagang Li,<sup>b</sup> Jiaqing Luo,<sup>\*c</sup> Peilin Liu,<sup>b</sup> Liangkun Zhang,<sup>b</sup> Weiyu Song,<sup>a,b</sup> Yuechang Wei,<sup>a,b</sup> Zhen Zhao,<sup>a,d</sup> Xiao Zhang,<sup>\*a,b</sup> Jian Liu<sup>a,c</sup> and Yuanqing Sun<sup>\*a,b</sup>

a. State Key Laboratory of Heavy Oil Processing, China University of Petroleum, Beijing 102249, China

b. College of Science, Beijing Key Lab of Oil & Gas Optical Detection Technology, and Basic Research Center for Energy Interdisciplinary, China University of Petroleum, Beijing 102249, China

c. State Key Laboratory of Heavy Oil Processing at Karamay, China University of Petroleum Beijing at Karamay, Karamay 834000, China

d. Institute of Catalysis for Energy and Environment, College of Chemistry and Chemical Engineering, Shenyang Normal University, Shenyang, 110034, China

\*Corresponding Author,

E-mail: [yqsun@cup.edu.cn](mailto:yqsun@cup.edu.cn); [luojiaqing@cupk.edu.cn](mailto:luojiaqing@cupk.edu.cn); [zhangxiao@cup.edu.cn](mailto:zhangxiao@cup.edu.cn).

## **DFT Theoretical Calculation Supplementary Note**

### **1. Design and optimization of the calculated catalyst model**

The model employed in the theoretical calculations was designed based on the experimental observations. In our models, Pt NPs on NSC and NC support are represented by an octahedron with fcc structure composed of 13 metal atoms. In turn, the substrate is represented by the 5 x 5 supercell of (110) surface of a graphene. In this model, nitrogen and sulfur doping is achieved by substituting carbon atoms in the lattice. The three nitrogen atoms and one sulfur atom to distinct of primary and secondary dopants in the simulation process. All of the periodic models of density-functional theory (DFT) in this work were calculated with the Vienna ab initio simulation package (VASP) code.<sup>1</sup> the Grimme method (DFT-D3) was incorporated to take into account the weak van der Waals interactions.<sup>2</sup> The projected augmented wave (PAW) method in real space was utilized to solve the single electron wavefunction at the ground state, with a cut-off energy of 500 eV for the plane wave basis set.<sup>3</sup> All structures were fully relaxed and optimization was considered convergent when the maximum force was below 0.05 eV Å<sup>-1</sup> and the convergence criterion of self-consistency reached 10<sup>-5</sup> eV.<sup>4</sup> In order to simulate the reaction mechanism of electrolytic water hydrogen evolution, some small molecules (H<sub>2</sub>O, H, H<sub>2</sub>) be adsorbed at the active site on the edge of Pt nanoparticles to form the corresponding adsorption state structure (Fig. S25 and Fig. S26).

### **2. The binding energy**

The binding energy was utilized as a parameter to assess the thermodynamic stability of Pt nanoparticle adsorption on the substrate surface with various interface modifications. The binding energy between nanoparticle and graphene was calculated as follows :

$$\Delta E_{Binding} = E_{total} - E_{nanoparticle} - E_{graphene}$$

Where  $E_{total}$  represents the total energy of the optimized adsorption system,  $E_{nanoparticle}$  denotes the energy of the isolated adsorbate and  $E_{graphene}$  signifies the energy of the catalytic material's substrate.

The binding energy serves as an indicator of the strength of interaction between the adsorbent and the substrate. A positive binding energy signifies lower thermodynamic stability within the adsorption system, indicating weaker interactions that are less favorable for binding. Conversely, a negative value

denotes higher thermodynamic stability, suggesting stronger interactions and more favorable conditions for the adsorption process.<sup>5,6</sup>

### **3. Differential Charge Density**

Differential charge density is widely recognized as a fundamental concept in quantum chemistry and solid-state physics, describing the variations in electron density during specific physical processes or chemical reactions. Differential charge density represents the difference between the charge density of a bonded system and the sum of the individual atomic charge densities prior to bonding.

Differential Charge Density of AB system is obtained as follows.

$$\Delta\rho = \rho_{AB} - \rho_A - \rho_B$$

The charge densities of the AB, A, and B systems are calculated separately in VASP. It is worth noting that the status and position of A and B should be consistent with those of AB.<sup>7</sup>

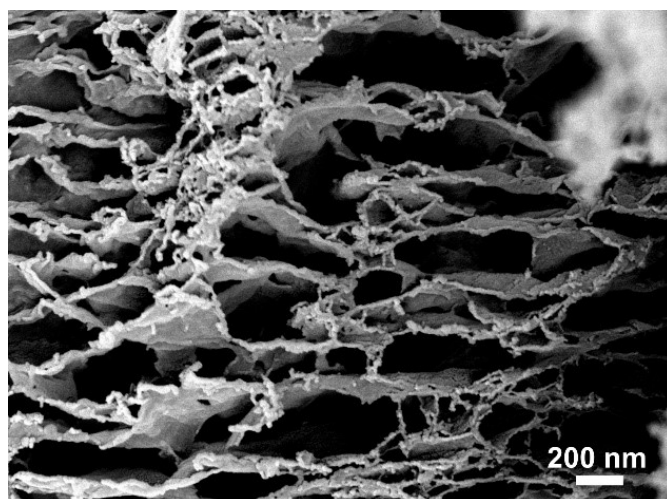

**Fig. S1** SEM image of Pt/NC

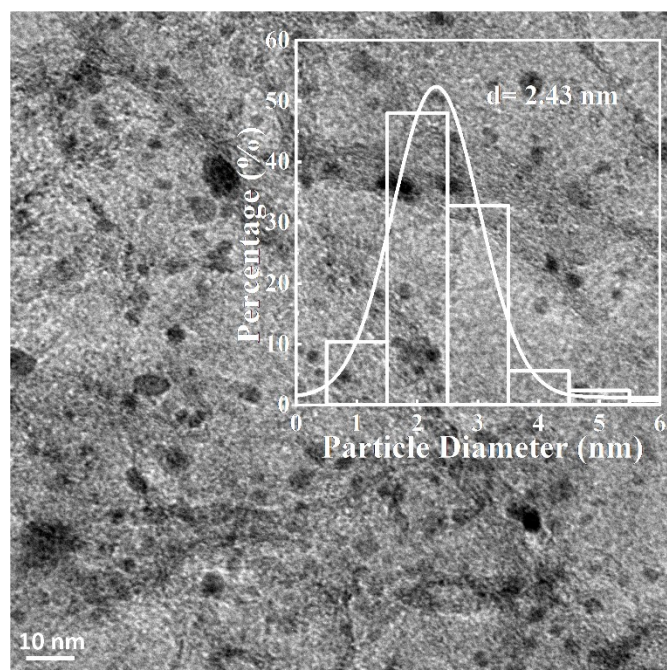

**Fig. S2** TEM image of Pt/NC (inset: particle size-distribution of Pt NPs).

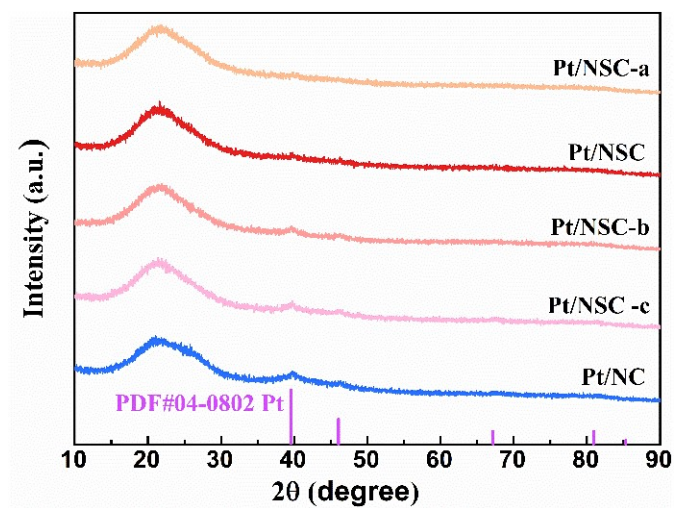

**Fig. S3** XRD patterns of Pt/NSC, Pt/NC and Pt/NSC-x (x = a, b, c).

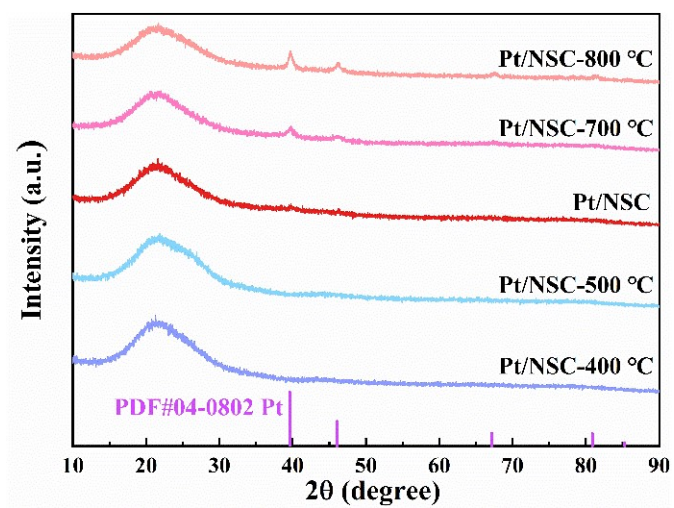

**Fig. S4** XRD of Pt/NSC and Pt/NSC-x (400, 500, 700, 800 °C).

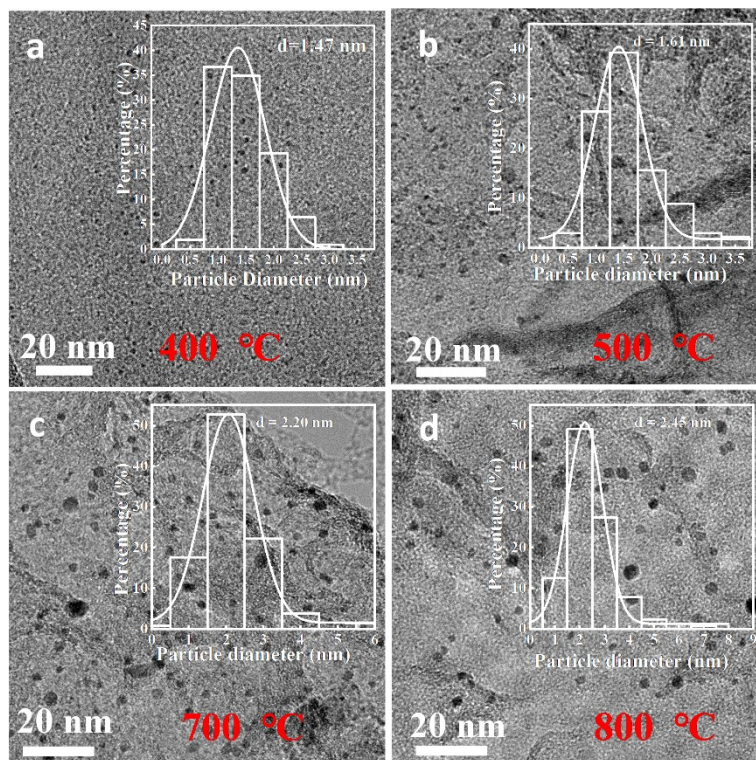

**Fig.S5** TEM images of Pt/NSC (a) 400 °C, (b) 500 °C, (c) 700 °C, (b) 800 °C and corresponding particle size distribution histograms.



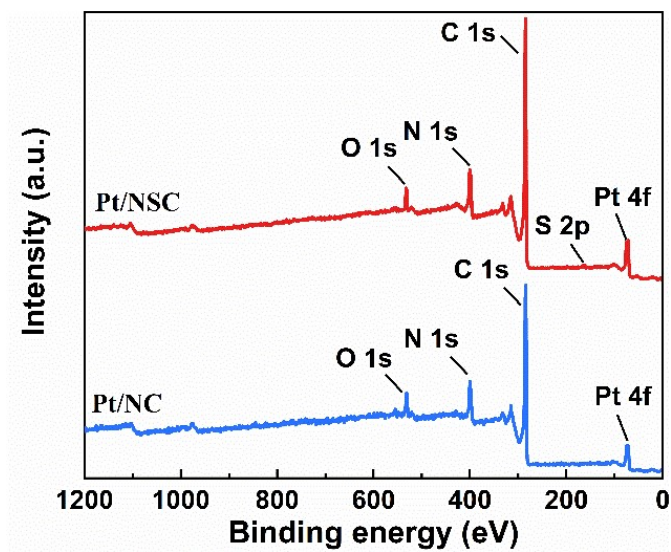

Fig. S6 The XPS spectra of Pt/NSC and Pt/NC.

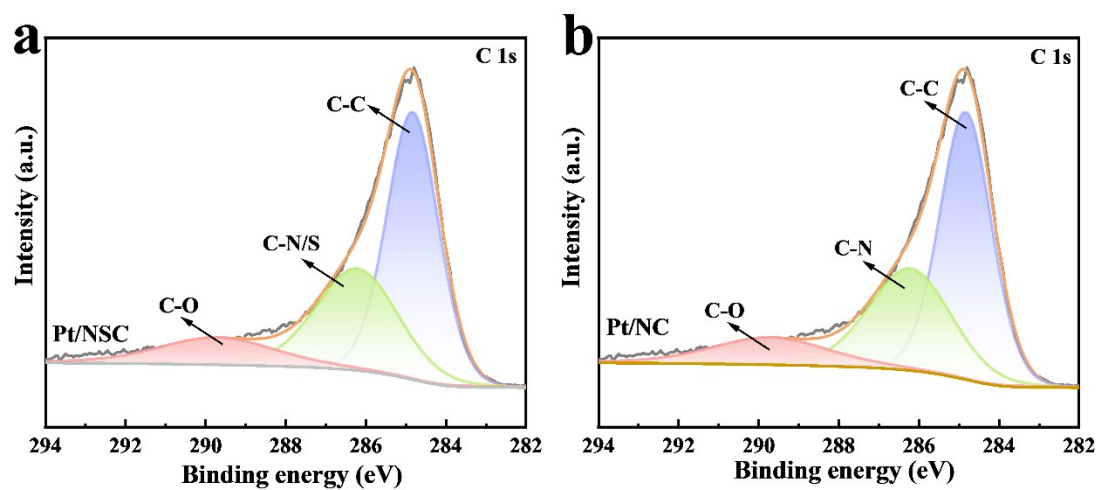

**Fig. S7** C 1s of XPS spectra of Pt/NSC (a) and Pt/NC (b).

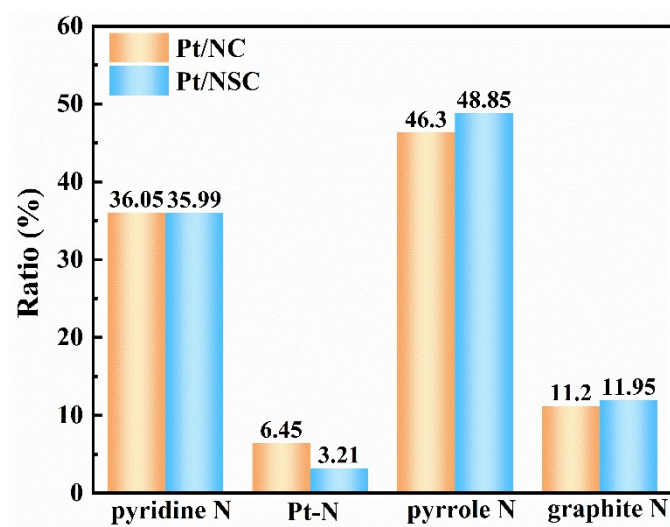

**Fig.S8** Comparison of different N types of Pt/NSC and Pt/NC.

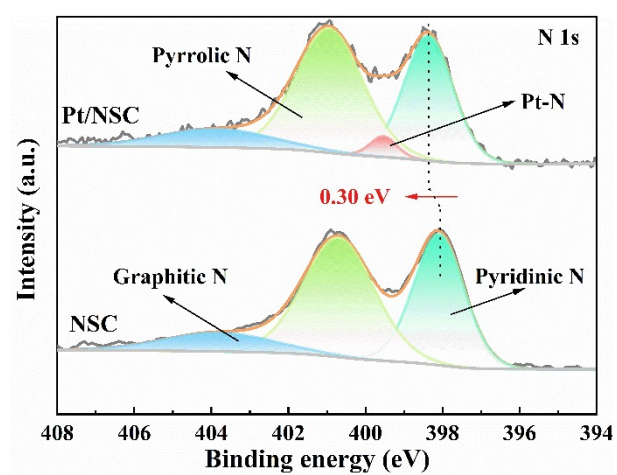

**Fig. S9** N 1s XPS spectra of Pt/NSC and NSC.

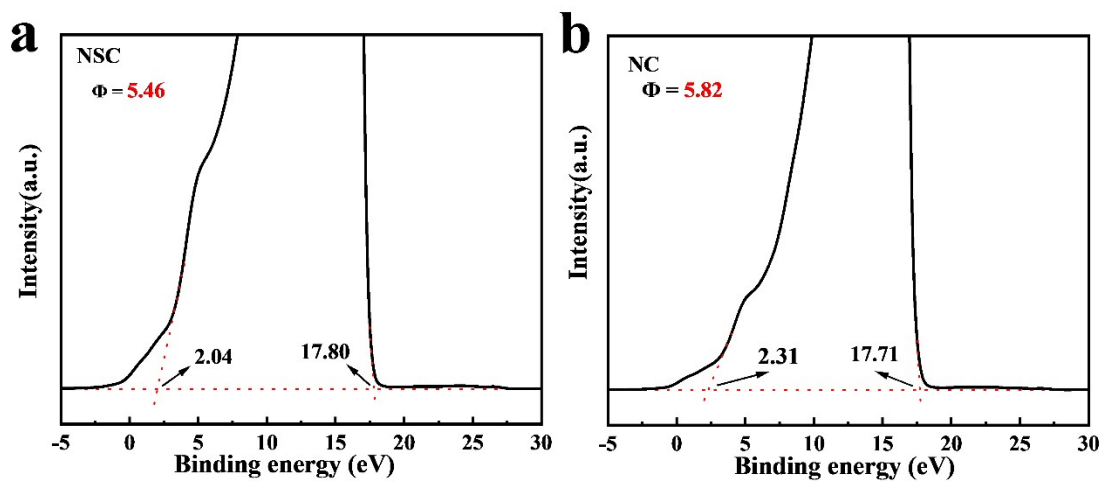

**Fig. S10** The  $E_{\text{cut-off}}$  and  $E_f$  of NSC (a) and NC (b) by UPS test, the work function according to the formula:  $W_f = 21.22 \text{ eV} + E_{\text{cut-off}} - E_f$ .

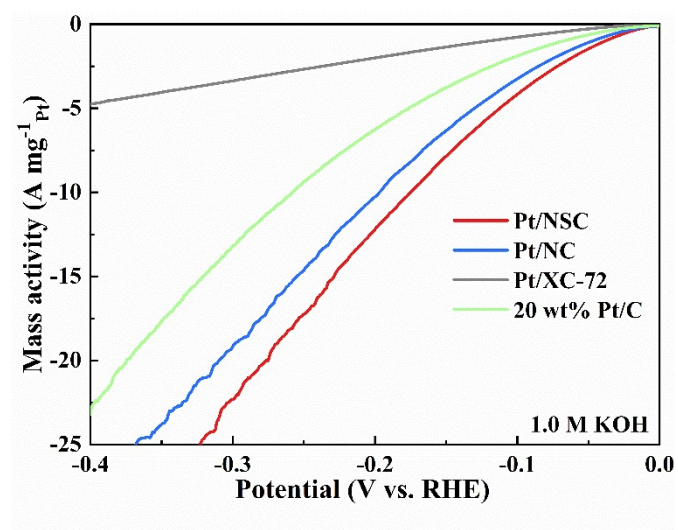

**Fig. S11** The mass activity of Pt/NSC, Pt/NC, 20 wt% Pt/C, Pt/XC-72, and NSC in 1.0 M KOH.

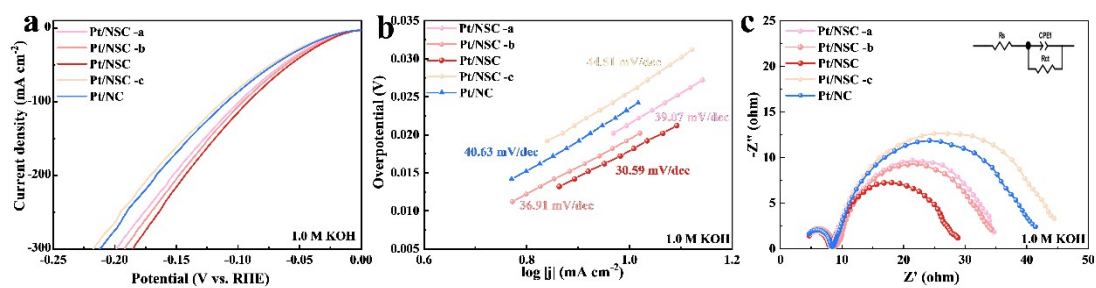

**Fig. S12** The Electrocatalytic HER performance of Pt/NSC, Pt/NC and Pt/NSC-x (x = a, b, c) in 1.0 M KOH. (a) Polarization curves. (b) Tafel plots, (c) Nyquist plots.

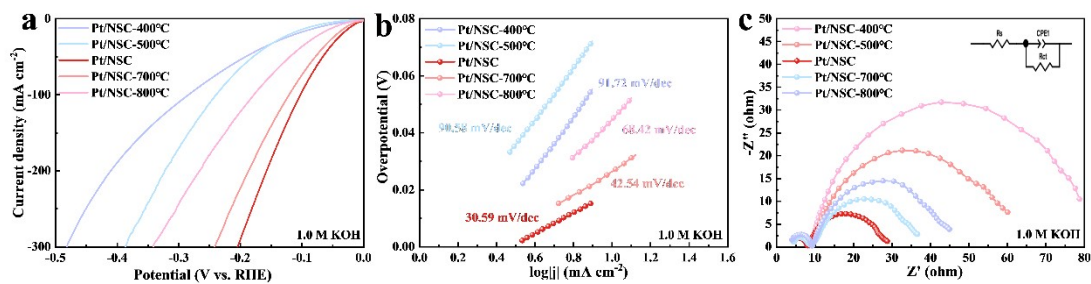

**Fig. S13** The HER performance of Pt/NSC and Pt/NSC-x (x = 400, 500, 700, 800 °C) in 1.0 M KOH. (a) Polarization curves. (b) Tafel plots, (c) Nyquist plots.



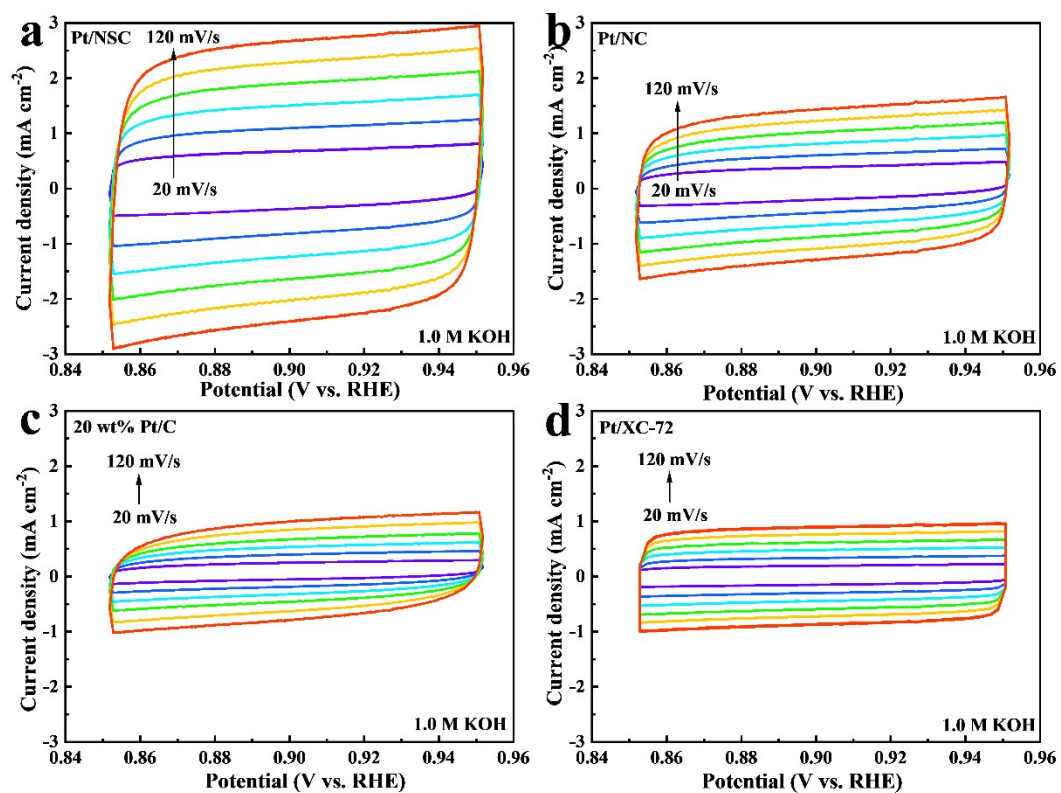

**Fig. S14.** CV curves in the non-Faradaic region of all samples with scan rates of 20, 40, 60, 80, 100, and 120 mV s<sup>-1</sup>, respectively.

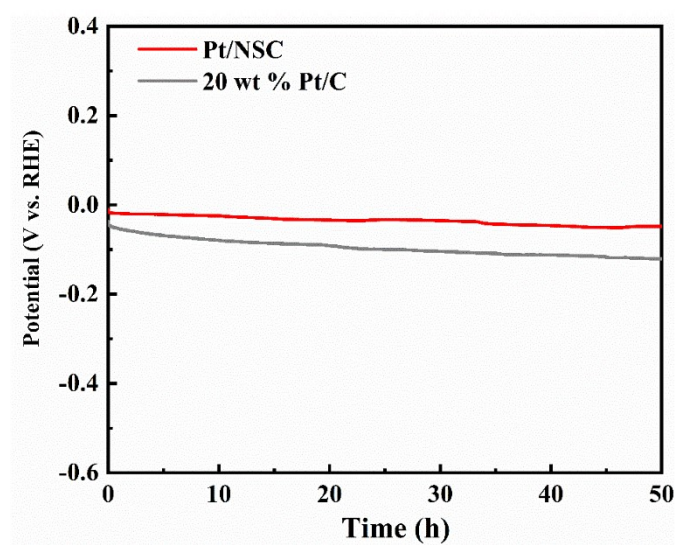

**Fig. S15** chronopotentiometry tests of Pt/NSC and 20 wt % Pt/C for 50 h at 10 mA cm<sup>-2</sup> in 1.0 M KOH.

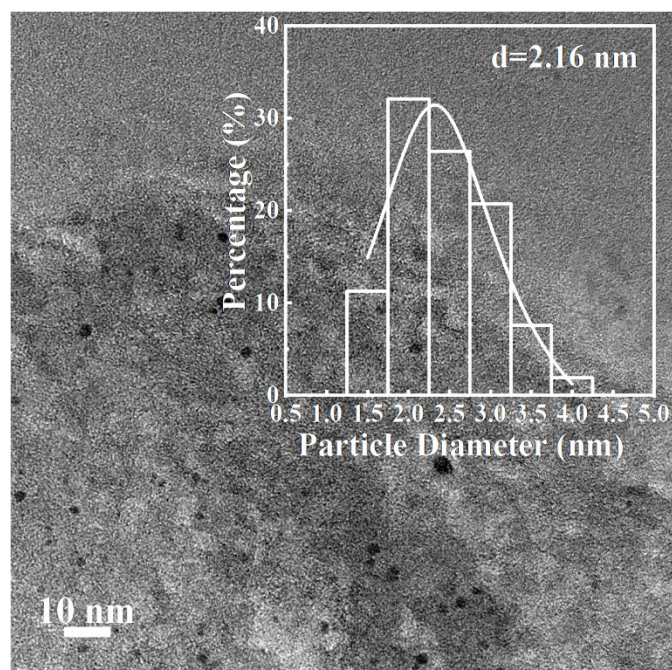

**Fig.S16** HR-TEM image of Pt/NSC after the chronopotentiometry test at 50 mA  $\text{cm}^{-2}$  in 1.0 M KOH (inset: size-distribution histogram of Pt NPs).

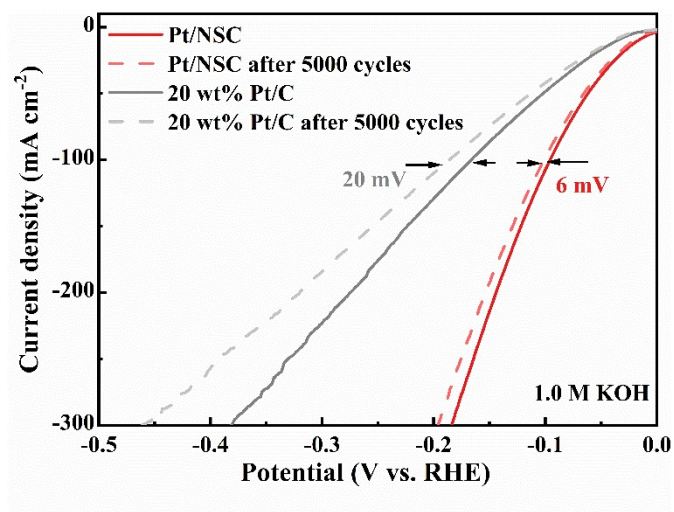

**Fig.S17** Comparing the LSV curves after 5000 CV cycles of the Pt/NSC and 20 wt% Pt/C in 1.0 M KOH.

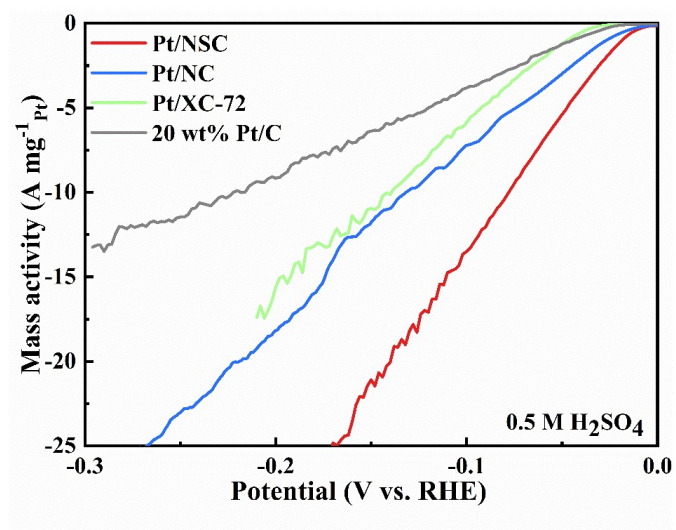

**Fig. S18** The mass activity of Pt/NSC, Pt/NC, 20 wt% Pt/C, Pt/XC-72, and NSC in 0.5 M  $\text{H}_2\text{SO}_4$ .

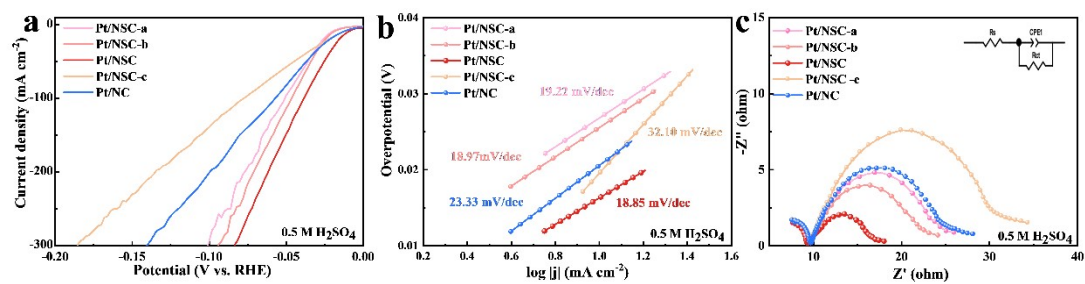

**Fig.S19** The Electrocatalytic HER performance of Pt/NSC, Pt/NC and Pt/NSC-x (x = a, b, c) in 0.5 M H<sub>2</sub>SO<sub>4</sub>. (a) Polarization curves. (b) Tafel plots, (c) Nyquist plots.

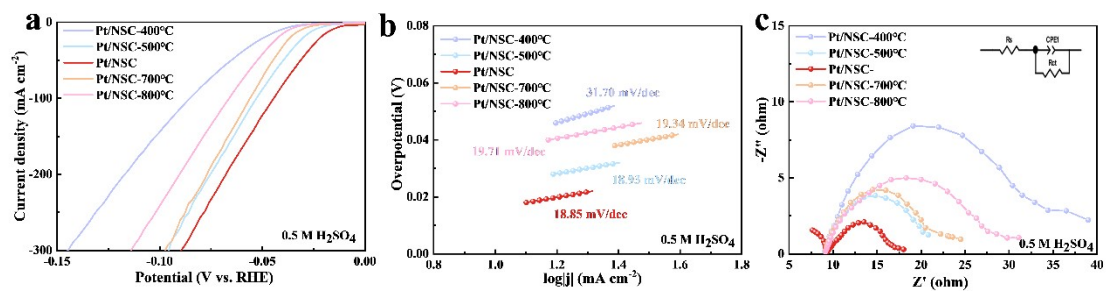

**Fig.S20** The HER performance of Pt/NSC and Pt/NSC-x (x=400, 500, 700, 800 °C) in 0.5 M H<sub>2</sub>SO<sub>4</sub>. (a) Polarization curves. (b) Tafel plots, (c) Nyquist plots.

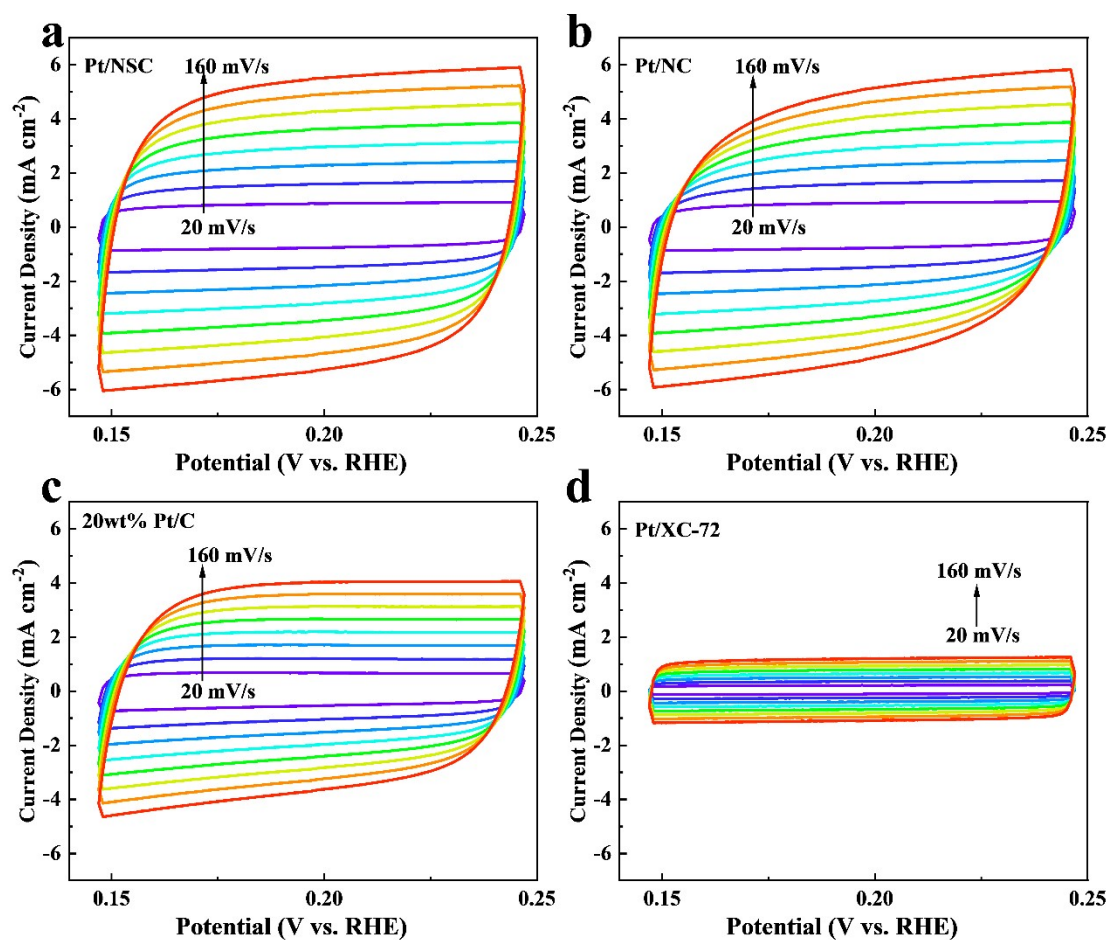

**Fig. S21** CV curves in the non-Faradaic region of all samples with scan rates of 20,40, 60, 80, 100, and 120 mV s<sup>-1</sup>, respectively.



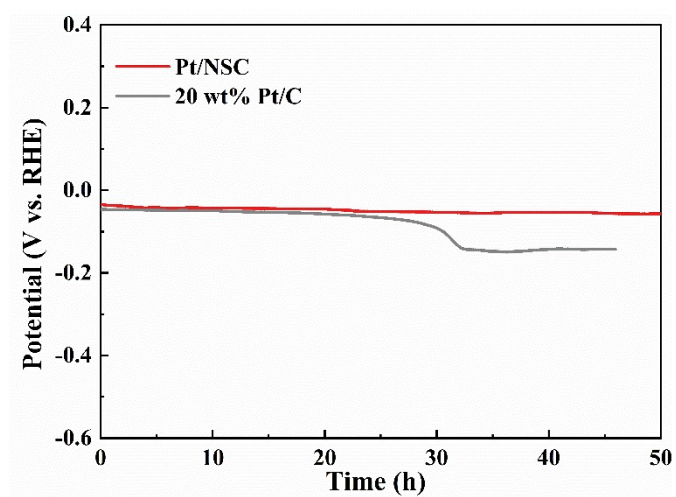

**Fig. S22** Chronopotentiometry tests of Pt/NSC and 20 wt % Pt/C for 50 h at  $10 \text{ mA cm}^{-2}$  in  $0.5 \text{ M H}_2\text{SO}_4$ .

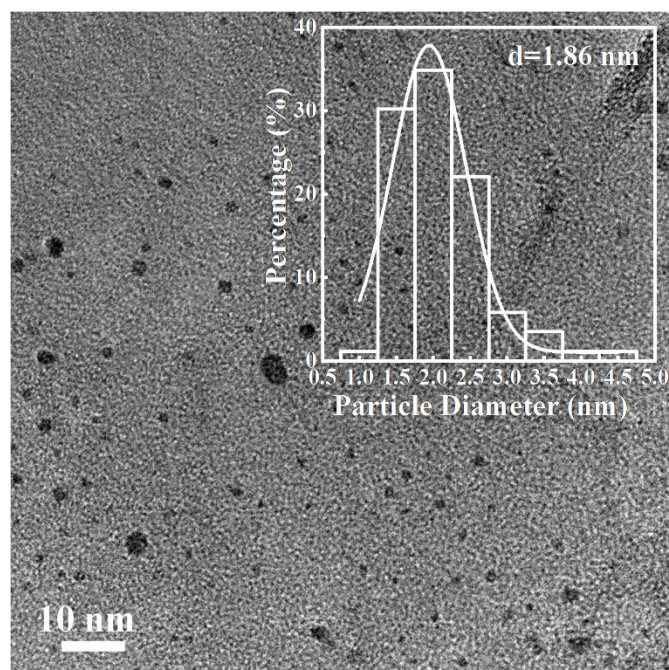

**Fig. S23** HR-TEM image of Pt/NSC after the chronopotentiometry test at  $50 \text{ mA cm}^{-2}$  in  $0.5 \text{ M H}_2\text{SO}_4$  (inset: size-distribution histogram of Pt NPs).

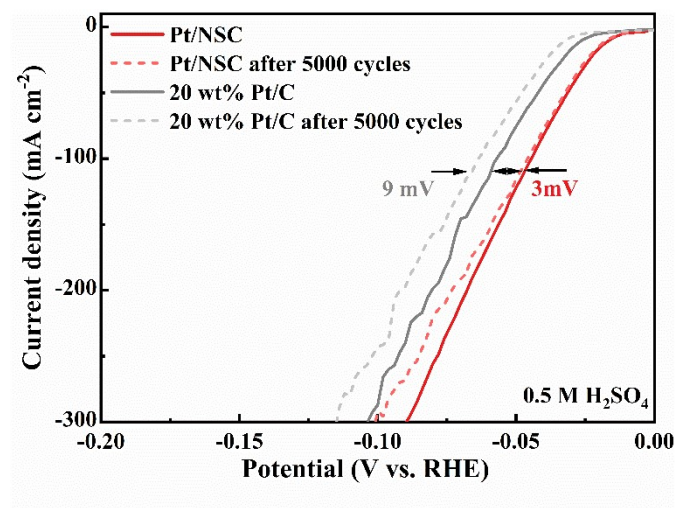

Fig.S24 Comparing the LSV curves after 5000 CV cycles of the Pt/NSC and 20 wt% Pt/C in 0.5 M H<sub>2</sub>SO<sub>4</sub>.

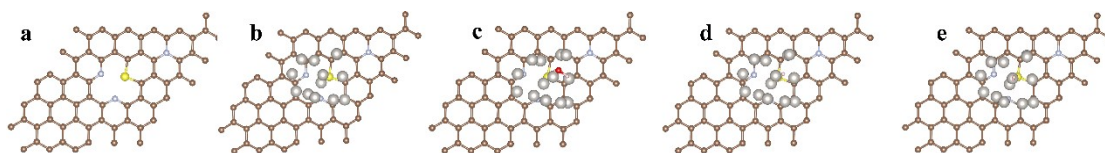

Fig. S25 Model diagrams of Pt / NSC. (a) NSC, Nitrogen and sulfur doping are achieved by substituting carbon atoms in the lattice, and the number of heteroatomic doping is used to distinguish between primary and secondary doping. (b) Pt/NSC, Pt NPs on NSC support are represented by an octahedron composed of 13 metal atoms. Small molecules (H<sub>2</sub>O, H, H<sub>2</sub>) be adsorbed at the active site on the edge of Pt nanoparticles to simulate the corresponding adsorption state structure. (c) H<sub>2</sub>O\*Pt/NSC. (d) H\*Pt/NSC, (e) H<sub>2</sub>\*Pt/NSC.

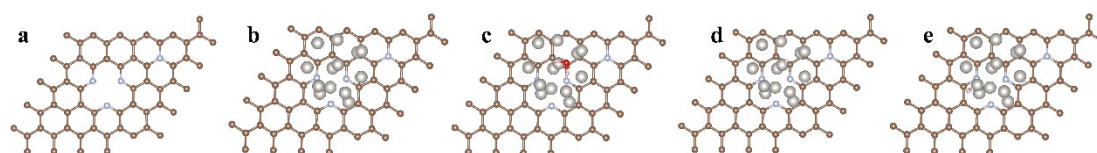

Fig. S26 Model diagrams of Pt / NC. (a) NC, Nitrogen doping is achieved by substituting carbon atoms in the lattice. (b) Pt/NC, Pt NPs on NC support are represented by an octahedron composed of 13 metal atoms. Small molecules (H<sub>2</sub>O, H, H<sub>2</sub>) be adsorbed at the active site on the edge of Pt nanoparticles to simulate the corresponding adsorption state structure. (c) H<sub>2</sub>O\*Pt/NC. (d) H\*Pt/NC, (e) H<sub>2</sub>\*Pt/NC.

**Table S1** Quantitative analysis of ICP-MS elements in Pt/NSC

| Test element | Percentage content (wt %) |
|--------------|---------------------------|
| <b>S</b>     | <b>0.28</b>               |
| <b>Pt</b>    | <b>7.677</b>              |

**Table S2** Comparison of alkaline media properties of Pt-based catalysts

| Catalyst                                         | Overpotential (mV)<br>@10 mA cm <sup>-2</sup> | Tafel slope<br>(mV dec <sup>-1</sup> ) | journal                                                |
|--------------------------------------------------|-----------------------------------------------|----------------------------------------|--------------------------------------------------------|
| Pt/NSC                                           | 17.8                                          | 30.59                                  | This work                                              |
| Pt/C                                             | 32.9                                          | 46.21                                  | This work                                              |
| Au@Pt <sub>1.5</sub> Co <sub>0.08</sub>          | 14                                            | 29                                     | J. Energy Chem, 2022, 69, 44–53                        |
| d-Pt–Ni                                          | 15                                            | 29                                     | ACS Mater. Lett, 2021, 3, 1738–1745                    |
| Pt/8-NCNT                                        | 17                                            | 33.3                                   | Adv. Energy Mater, 2022, 12, 2200110                   |
| Pt/CeO <sub>x</sub> /C (3nm)                     | 19                                            | 50                                     | Adv. Funct. Mater, 2024, 2402966                       |
| Pt-AC/Cr–N–C                                     | 19                                            | 30                                     | J. Am. Chem. Soc, 2023, 145, 21432–21441               |
| Pt <sub>0.5</sub> Fe <sub>0.5</sub> @CNOs        | 19                                            | 23.9                                   | Appl. Surf. Sci, 2023, 636, 157860                     |
| Pt-30/NCM                                        | 19.5                                          | 40.8                                   | Chem. Eng. J, 2022,436, 135186                         |
| Pt/FeOOH@NiFe<br>LDHs                            | 20                                            | 51                                     | ACS. Catal, 2024, 14, 7867–7876                        |
| Pt <sub>SA</sub> -Pt <sub>C</sub> /NDPCM         | 20                                            | 58.9                                   | Adv. Funct. Mater, 2023, 2304852                       |
| MXene/B-Pt                                       | 20                                            | 51.8                                   | J. Mater. Chem. A, 2023, 11, 5830–5840                 |
| Pt <sub>61</sub> Ga <sub>39</sub> @CNT           | 20                                            | 31.7                                   | App. Catal. B-environ, 2023, 322, 122100               |
| Pt <sub>SAC</sub> –N <sub>x</sub> C <sub>y</sub> | 24                                            | 60.25                                  | ACS Appl. Mater. Interfaces, 2023, 15, 29195-<br>29203 |
| PANI@Pt/S-TiN<br>NTs/Ti                          | 12                                            | 31.2                                   | Small, 2022, 18, 2205603                               |
| PtC <sub>60</sub>                                | 24.3                                          | 41.9                                   | Nat. Commun, 2023, 14:1711                             |
| Pt/C <sub>60</sub> -2/KB                         | 25                                            | 55                                     | Nat. Commun, 2023, 14:2460                             |
| Pt <sub>3</sub> Fe/NMCS-A                        | 29                                            | 50                                     | Adv. Mater, 2023, 35, 2303030                          |
| CoPt-Pt <sub>SA</sub> /NDPCF                     | 31                                            | 43.65                                  | Adv. Funct. Mater, 2022, 32, 2205920                   |
| Pt <sub>3</sub> Co@NCNT                          | 36                                            | 34.8                                   | Angew. Chem. Int. Ed, 2021, 60, 19068–19073            |
| PtNi-NC-900                                      | 37.4                                          | 43.2                                   | J. Mater. Chem. A, 2022, 10, 13727–13734               |
| PtM@CN-HF                                        | 38                                            | 69.5                                   | Chem. Eng. J, 2024, 481, 148430                        |
| Pt <sub>1</sub> Ru <sub>x</sub> @C               | 48.7                                          | 55.6                                   | J. Mater. Chem. A, 2024, 12, 4108–4122                 |
| Pd <sub>7</sub> @Pt <sub>3</sub>                 | 49                                            | 42.7                                   | Mater. Horiz, 2024, 11, 1964                           |
| PtRu/CNT@SnO <sub>2-x</sub>                      | 53                                            | 48                                     | J. Am. Chem. Soc, 2024, 146, 21453–21465               |

**Table S3** Comparison of acidic media properties of Pt-based catalysts

| Catalyst                                  | Overpotential (mV)<br>@10 mA cm <sup>-2</sup> | Tafel slope<br>(mV dec <sup>-1</sup> ) | journal                                            |
|-------------------------------------------|-----------------------------------------------|----------------------------------------|----------------------------------------------------|
| Pt/NSC                                    | 10.2                                          | 18.85                                  | This work                                          |
| Pt/C                                      | 21.1                                          | 20.18                                  | This work                                          |
| Pt@NCL-CNF                                | 5.3                                           | 30.9                                   | Int. J. Hydrogen. Energy, 2024, 71, 1242–1254      |
| PtM@CN-HF                                 | 6                                             | 33                                     | Chem. Eng. J, 2024, 481, 148430                    |
| Pt <sub>0.5</sub> Fe <sub>0.5</sub> @CNOs | 11                                            | 12.5                                   | Appl. Surf. Sci, 2023, 636, 157860                 |
| 5% 1T-PtO <sub>2</sub> /C                 | 12                                            | 18.6                                   | Energy Environ. Sci, 2023, 16, 574–583             |
| PANI@Pt/S-TiN<br>NTs/Ti                   | 12                                            | 26.9                                   | Small, 2022, 18, 2205603                           |
| Pt <sub>3</sub> Fe/NMCS-A                 | 13                                            | 21                                     | Adv. Mater, 2023, 35, 2303030                      |
| Pt <sub>1</sub> Ru <sub>x</sub> @C        | 13.15                                         | 20.7                                   | J. Mater. Chem. A, 2024, 12, 4108–4122             |
| MXene/B-Pt                                | 14                                            | 78.6                                   | J. Mater. Chem. A, 2023, 11, 5830–5840             |
| Pt <sub>61</sub> Ga <sub>39</sub> @CNT    | 18                                            | 25.9                                   | Appl. Catal. B-Environ, 2023, 322, 122100          |
| PtW NPs/C                                 | 19.4                                          | 27.8                                   | J. Am. Chem. Soc, 2020, 142, 17250–17254           |
| PtCNP <sub>2</sub>                        | 22                                            | 31.2                                   | J. Mater. Chem. A, 2022, 10, 5962–5970             |
| DC–PANI–Pt                                | 23                                            | 36.5                                   | J. Power Sources, 2024, 608, 234653                |
| S-PtCo@MC                                 | 23                                            | 23                                     | ACS Nano, 2023, 17, 3889–3900                      |
| Pt-WC/CNT                                 | 25                                            | 28.2                                   | Small, 2024, 20, 2309675                           |
| Pt–T/G-150                                | 26.4                                          | 30                                     | ACS Appl. Mater. Interfaces, 2020, 12, 40204–40212 |
| Pt@DG                                     | 30                                            | 53                                     | J. Am. Chem. Soc, 2022, 144, 2171–2178             |
| Pt NPs/DPC                                | 30                                            | 31                                     | J. Alloys Compd, 2023, 171970                      |
| Pt/A_PGnP                                 | 31                                            | 31.09                                  | Mater. Today. Sustainability, 2023, 24, 100598     |
| Pd <sub>7</sub> @Pt <sub>3</sub>          | 33                                            | 23.1                                   | Mater. Horiz, 2024, 11, 1964                       |
| PtCu/WO <sub>3</sub> @CF                  | 41                                            | 45.9                                   | Adv. Funct. Mater, 2022, 32, 2112207               |
| Pt <sub>3</sub> Co@NCNT                   | 42                                            | 27.2                                   | Angew. Chem. Int. Ed, 2021, 60, 19068–19073        |
| m-Pt@MoS <sub>2</sub>                     | 47                                            | 32                                     | Small, 2024, 20, 2309427                           |



## References

- 1 S. Wang, Q. Zhao, Q. Ma, R. Gan, Y. Ran, W. Fang, C. Wang, L. Fang, Q. Feng, Y. Zhang, D. Wang and Y. Li, *Nano Lett*, 2024, **24**, 11286-11294.
- 2 G. Kresse and J. Furthmüller, *Phys. Rev. B*, 1996, **54**, 11169-11186.
- 3 S. Grimme, J. Antony, S. Ehrlich, H. Krieg, *J. Chem. Phys*, 2010, **132**, 154104.
- 4 J. Li, J. Liu, C. Chen, J. Guo, R. Bi, S. Chen, L. Zhang and M. Zhu, *Chem. Eng. J*, 2022, **436**, 135186.
- 5 T. Zhao, M. Li, D. Xiao, X. Yang, Q. Li, L. An, Z. Deng, T. Shen, M. Gong, Y. Chen, G. Wang, X. Zhao, L. Xiao, X. Yang, L. Li and D. Wang, *J. Am. Chem. Soc*, 2023, **145**, 4088-4097.
- 6 L. Chen, L. Kang, S. Geng, L. Cheng, D. Cai, S. Song, H. Jia and Y. Wang, *Adv. Funct. Mater*, 2024, **34**, 2403467.
- 7 G. Henkelman, A. Arnaldsson and H. Jónsson, *Computational Materials Science*, 2005, **36**, 354-360.
